# Supplementary material
Source: publisher figshare collection journal article supplement (https://frontiersin.figshare.com/ndownloader/files/40927526)
Supplement: Supplementary file 1 [file 40927526]

Supplementary Material

Article Title

**Elephants in the farm – changing temporal and seasonal patterns of human-elephant interactions in a forest-agriculture matrix in the Western Ghats, India.**

Anoop NR, S[iddhartha Krishnan](https://www.tandfonline.com/author/Krishnan%2C+Siddhartha), T. Ganesh

*** Correspondence:** Corresponding Author: [anoop.nr@atree.org](mailto:anoop.nr@atree.org)

# Supplementary Figures
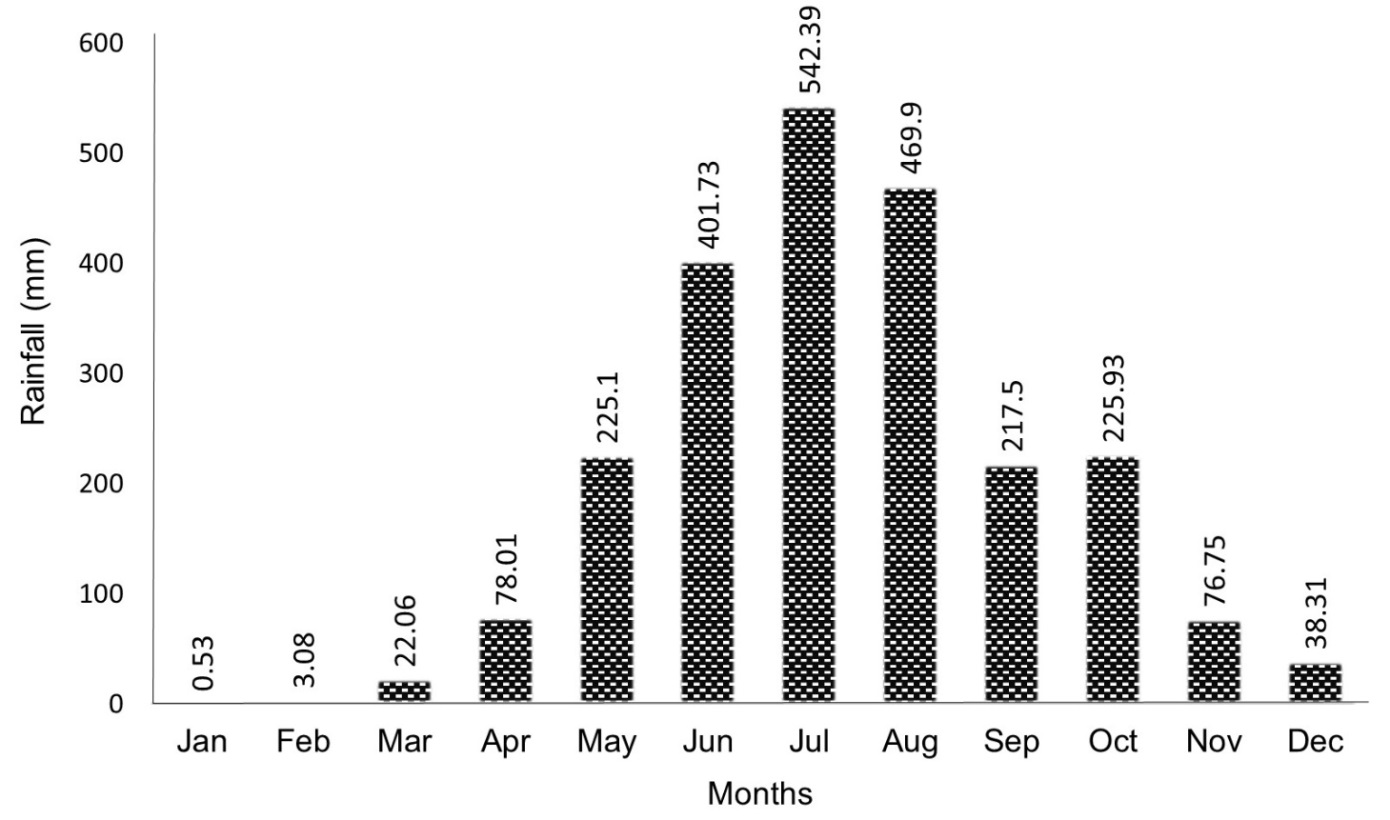


**Supplementary Figure 1.** Mean monthly rainfall during the study period in Wayanad.

|  | **Jan** | **Feb** | **Mar** | **Apr** | **May** | **Jun** | **Jul** | **Aug** | **Sep** | **Oct** | **Nov** | **Dec** |
| --- | --- | --- | --- | --- | --- | --- | --- | --- | --- | --- | --- | --- |
| Paddy |  |  |  |  |  |  |  |  |  |  |  |  |
| Plantain |  |  |  |  |  |  |  |  |  |  |  |  |
| Jackfruit |  |  |  |  |  |  |  |  |  |  |  |  |
| Mango |  |  |  |  |  |  |  |  |  |  |  |  |
| Coconut |  |  |  |  |  |  |  |  |  |  |  |  |
| Areca nut |  |  |  |  |  |  |  |  |  |  |  |  |
| Coffee |  |  |  |  |  |  |  |  |  |  |  |  |

| Emergence |  |
| --- | --- |
| Medium stage |  |
| Ripen |  |
| All stages across the seasons |  |

**Supplementary Figure 1I.** The cropping calendar (major commercial and non-commercial crops attract elephants) of the main crop types in the study areas.


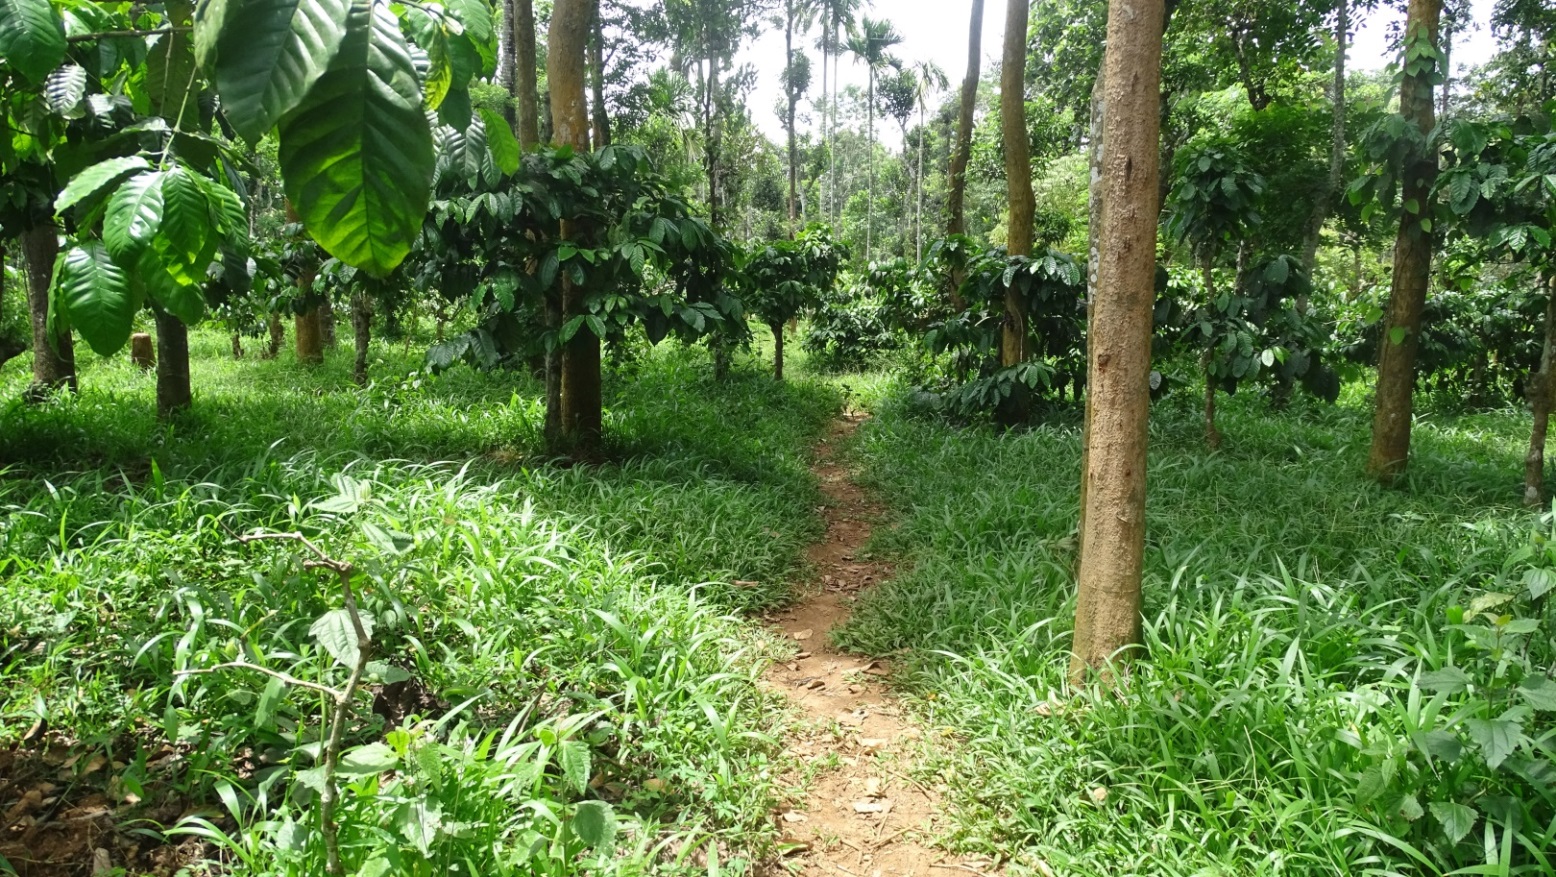


**Supplementary Figure III.** Permanent paths formed in the coffee plantations due to continuous use by bull elephants during jackfruit season.

**
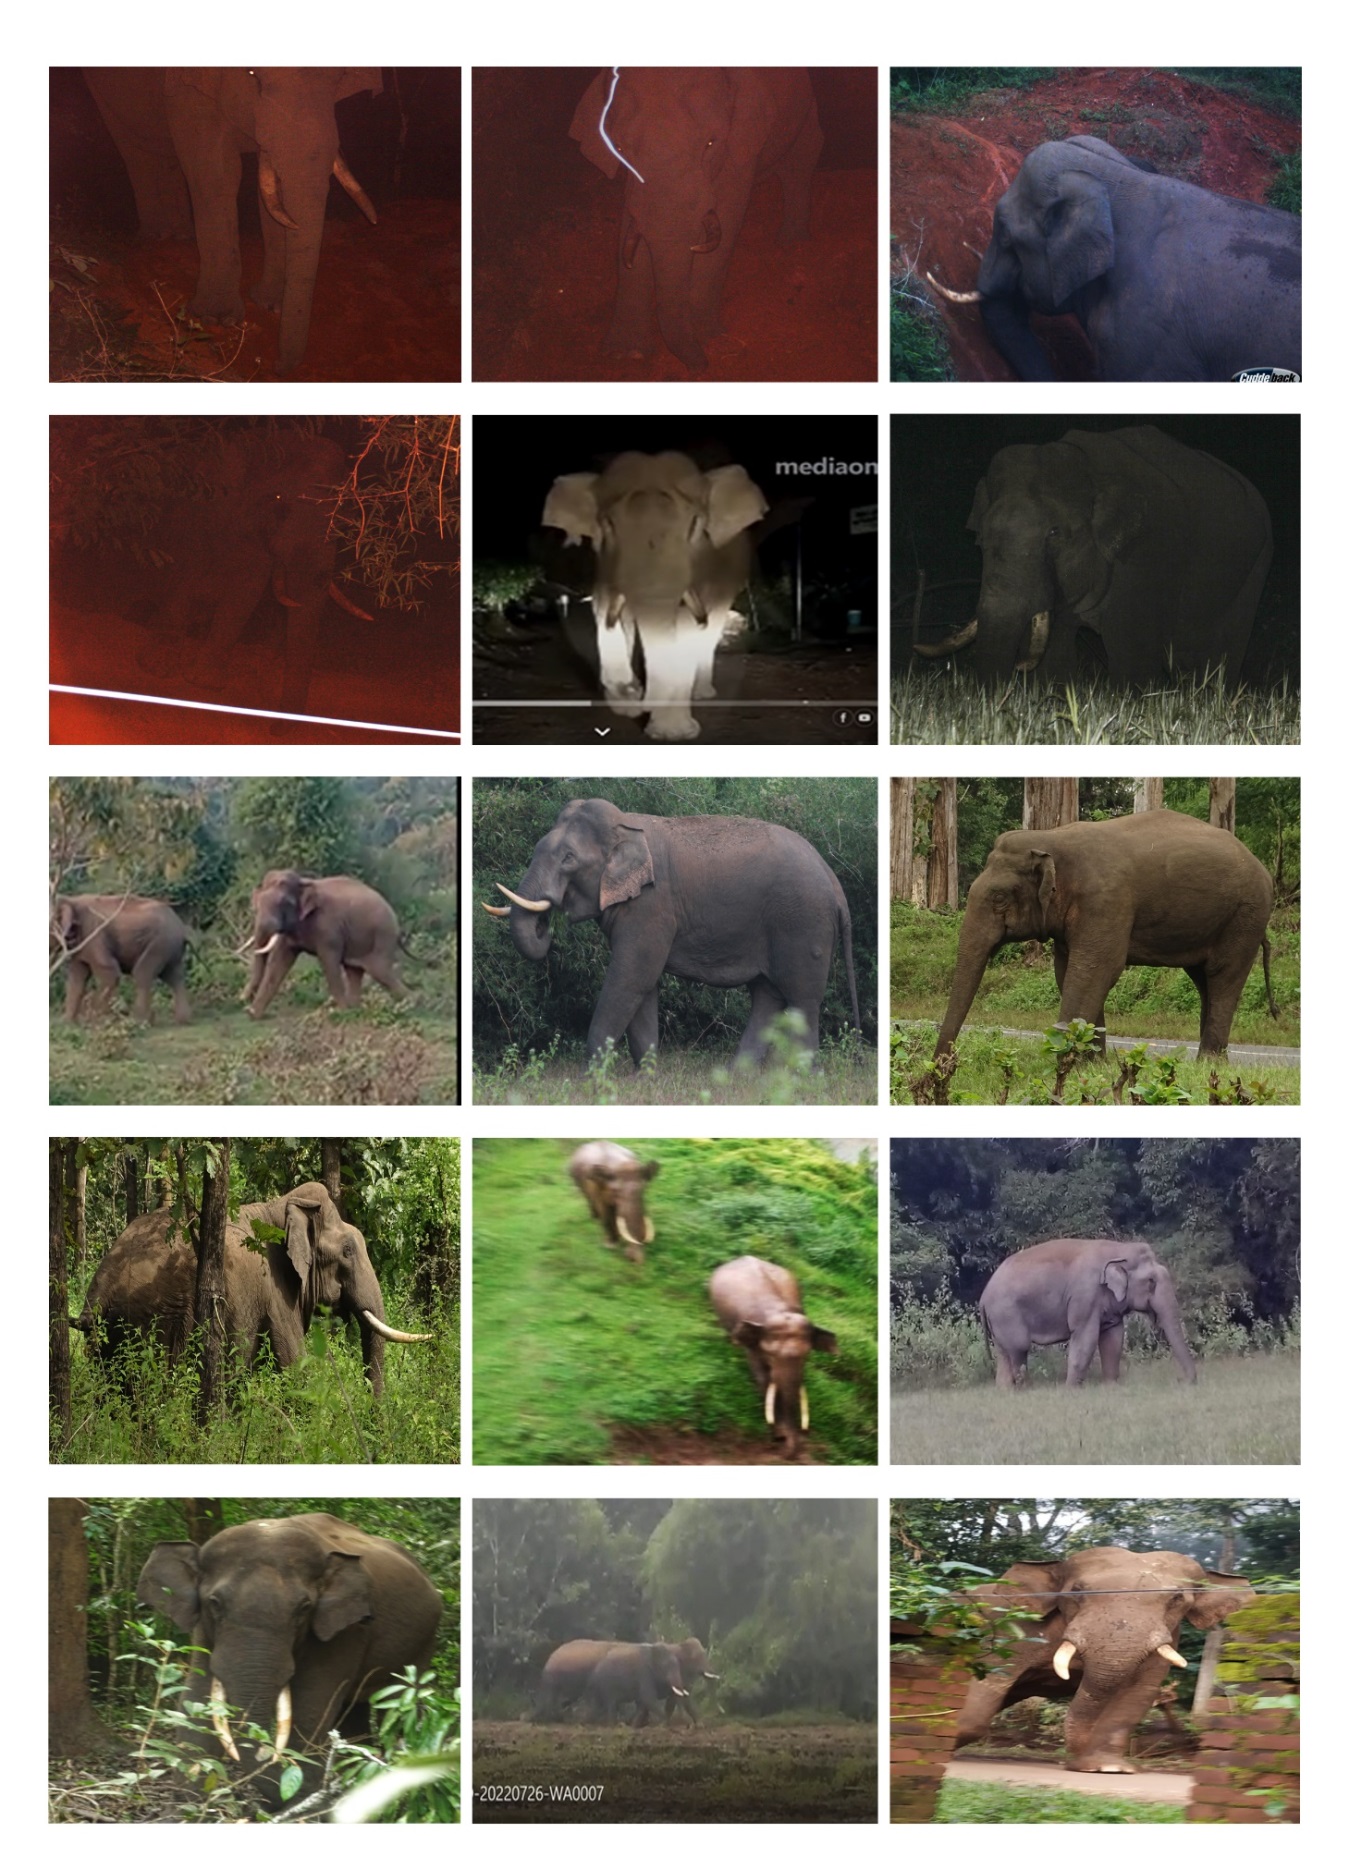
**

**Supplementary Figure IV.** Different crop-raiding elephants identified from Tholpetty and Chethalayam forest ranges during 2019 and 2020.
